# Supplementary material for: Small and Large Extracellular Vesicles Derived from Pleural Mesothelioma Cell Lines Offer Biomarker Potential
Source: MDPI journal article supplement (doi:10.3390/cancers15082364), 2023-04-18
Supplement: s1 [file s1]

## Supplementary Table

**Table S1.** Common proteins from this study and from mEXOS signature from Greening *et al.* (2016).

| Proteins                                                                | Gene     | 10 K | 18 K | 100 K |
|-------------------------------------------------------------------------|----------|------|------|-------|
| Alpha-actinin-4 (F-actin cross-linking protein) (Non-muscle alpha-acti  | ACTN4    | 5    | 5    | 5     |
| Alpha-enolase (EC 4.2.1.11) (2-phospho-D- glycerate hydro-lyase) (C-myc | ENO1     | 5    | 5    | 5     |
| Fibronectin                                                             | FN1      | 5    | 5    | 5     |
| Glyceraldehyde-3-phosphate dehydrogenase (GAPDH) (EC 1.2.1.12) (Peptid  | GAPDH    | 5    | 5    | 5     |
| Heat shock 70 kDa protein 1A/1B (Heat shock 70 kDa protein 1/2) (HSP70  | HSPA1A   | 5    | 5    | 5     |
| Heat shock cognate 71 kDa protein (Heat shock 70 kDa protein 8)         | HSPA8    | 5    | 5    | 5     |
| Heat shock protein HSP 90-alpha (Heat shock 86 kDa) (HSP 86) (HSP86)    | HSP90AA1 | 5    | 5    | 5     |
| Heat shock protein HSP 90-beta (HSP 90) (Heat shock 84 kDa) (HSP 84)    | HSP90AB1 | 5    | 5    | 5     |
| Myosin-9 (Cellular myosin heavy chain, type A) (Myosin heavy chain 9)   | MYH9     | 5    | 5    | 5     |
| Pyruvate kinase PKM (EC 2.7.1.40) (Cytosolic thyroid hormone-binding p  | PKM      | 5    | 5    | 5     |
| Annexin A1 (Annexin I) (Annexin-1) (Calpactin II) (Calpactin-2) (Chrom  | ANXA1    | 5    | 5    | 4     |
| Annexin A5 (Anchoring CII) (Annexin V) (Annexin-5) (Calphobindin I) (CB | ANXA5    | 5    | 5    | 4     |
| Integrin alpha-3 (CD49 antigen-like family member C) (FRP-2) (Galactop  | ITGA3    | 5    | 5    | 4     |
| Moesin (Membrane-organizing extension spike protein)                    | MSN      | 5    | 5    | 4     |
| Annexin A2 (Annexin II) (Annexin-2) (Calpactin I heavy chain) (Calpact  | ANXA2    | 5    | 4    | 4     |
| Laminin subunit alpha-1 (Laminin A chain) (Laminin-1 subunit alpha) (L  | LAMA1    | 4    | 3    | 4     |
| EGF-like repeat and discoidin I-like domain-containing protein 3 (Deve  | EDIL3    | 4    | 2    | 4     |
| Annexin A6                                                              | ANXA6    | 4    | 1    | 0     |
| Nidogen-1 (NID-1) (Entactin)                                            | NID1     | 3    | 4    | 4     |
| Complement factor B (Uncharacterized protein) (cDNA FLJ55673, highly s  | CFB      | 3    | 3    | 2     |
| Fibrillin-2                                                             | FBN2     | 3    | 3    | 2     |
| Branched-chain-amino-acid aminotransferase, cytosolic (BCAT(c)) (EC 2.  | BCAT1    | 3    | 2    | 3     |
| tRNA-splicing ligase RtcB homolog (EC 6.5.1.3)                          | RTCB     | 3    | 2    | 3     |
| Vitamin K-dependent protein S                                           | PROS1    | 3    | 1    | 2     |
| Procollagen galactosyltransferase 1 (EC 2.4.1.50) (Collagen beta(1-O)g  | COLGALT1 | 3    | 0    | 1     |
| CD63 antigen                                                            | CD63     | 2    | 3    | 4     |
| Pregnancy-specific beta-1-glycoprotein 4 (PS-beta-G-4) (PSBG-4) (Pregn  | PSG4     | 2    | 2    | 2     |
| Pappalysin-1 (EC 3.4.24.79) (Insulin-like growth factor-dependent IGF-  | PAPPA    | 2    | 1    | 3     |
| 2',3'-cyclic-nucleotide 3'-phosphodiesterase (CNP) (CNPase) (EC 3.1.4.  | CNP      | 2    | 1    | 1     |
| Clustered mitochondria protein homolog                                  | CLUH     | 1    | 1    | 2     |
| Intelectin-1 (ITLN-1) (Endothelial lectin HL-1) (Galactofuranose-bindi  | ITLN1    | 1    | 1    | 2     |
| Calretinin (CR) (29 kDa calbindin)                                      | CALB2    | 1    | 1    | 1     |
| Galactosylceramide sulfotransferase (Fragment)                          | GAL3ST1  | 1    | 1    | 1     |
| Integrin alpha-4 (CD49 antigen-like family member D) (Integrin alpha-I  | ITGA4    | 1    | 1    | 1     |
| Interferon-induced protein with tetratricopeptide repeats 1 (IFIT-1) (  | IFIT1    | 1    | 1    | 1     |
| Interferon-induced protein with tetratricopeptide repeats 2 (IFIT-2) (  | IFIT2    | 1    | 1    | 1     |
| Oncostatin-M-specific receptor subunit beta (Interleukin-31 receptor s  | OSMR     | 1    | 1    | 1     |
| Platelet-derived growth factor D (PDGF-D) (Iris-expressed growth facto  | PDGFD    | 1    | 1    | 1     |
| Teneurin-2                                                              | TENM2    | 1    | 1    | 1     |
| Carboxypeptidase E (CPE) (EC 3.4.17.10) (Carboxypeptidase H) (CPH) (En  | CPE      | 1    | 1    | 0     |
| Neuropilin 2                                                            | NRP2     | 1    | 0    | 3     |
| A disintegrin and metalloproteinase with thrombospondin motifs 12 (ADA  | ADAMTS12 | 1    | 0    | 2     |
| Interleukin-7 receptor subunit alpha                                    | IL7R     | 1    | 0    | 2     |
| 2'-5'-oligoadenylate synthase-like protein (2'-5'-OAS-related protein)  | OASL     | 1    | 0    | 0     |
| Adipocyte plasma membrane-associated protein (Protein BSCv)             | APMAP    | 1    | 0    | 0     |
| ADP-ribosyl cyclase 2                                                   | BST1     | 0    | 1    | 1     |
| Desmoplakin (DP) (250/210 kDa paraneoplastic pemphigus antigen)         | DSP      | 0    | 1    | 1     |
| Heterogeneous nuclear ribonucleoprotein D-like (hnRNP D-like) (hnRNP D) | HNRNPDL  | 0    | 0    | 1     |
