# Supplementary material for: Small and Large Extracellular Vesicles Derived from Pleural Mesothelioma Cell Lines Offer Biomarker Potential
Source: MDPI journal article supplement (doi:10.3390/cancers15082364), 2023-04-18
Supplement: s1 [file s1]

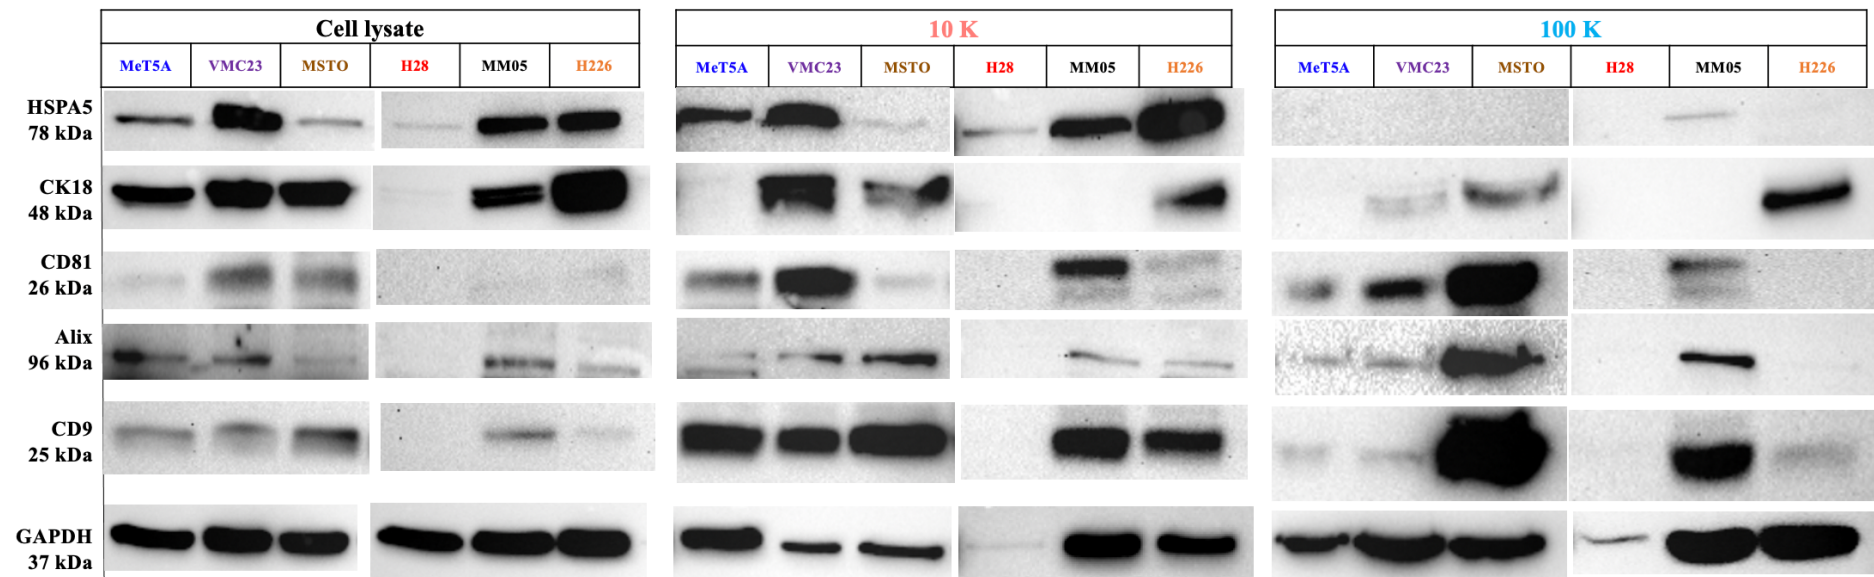

**Figure S1: Western blot results for all markers in the large and small EV fractions across all cell lines used in the study.**
